# Supplementary material for: Recurrent loss of CenH3 is associated with independent transitions to holocentricity in insects
Source: PubMed Central journal article supplement (PMC4359364; doi:10.7554/elife.03676), 2014-09-23
Supplement: elife03676s001.pdf [file elife03676s001.pdf]

| Order        | Species name                      | Source of genome/transcriptome/proteome                                                                                                               | as current as/ version |
|--------------|-----------------------------------|-------------------------------------------------------------------------------------------------------------------------------------------------------|------------------------|
| DIPTERA      | <i>Drosophila melanogaster</i>    | <a href="http://flybase.org/">http://flybase.org/</a>                                                                                                 | Dec-14                 |
| DIPTERA      | <i>Aedes aegyptii</i>             | <a href="http://flybase.org/">http://flybase.org/</a>                                                                                                 | Dec-14                 |
| LEPIDOPTERA  | <i>Bombyx mori</i>                | <a href="http://silkworm.genomics.org.cn/silkdb/">http://silkworm.genomics.org.cn/silkdb/</a>                                                         | SilkDB V2.0            |
| LEPIDOPTERA  | <i>Danaus plexippus</i>           | <a href="http://reppertlab.org/monarchbase/">http://reppertlab.org/monarchbase/</a>                                                                   | Assembly v3            |
| LEPIDOPTERA  | <i>Plutella xylostella</i>        | <a href="http://dbm.dna.affrc.go.jp/px/">http://dbm.dna.affrc.go.jp/px/</a>                                                                           | Feb-14                 |
| LEPIDOPTERA  | <i>Manduca sexta</i>              | <a href="https://www.hgsc.bcm.edu/arthropods/tobacco-hornworm-genome-project">https://www.hgsc.bcm.edu/arthropods/tobacco-hornworm-genome-project</a> | Assembly v1.0          |
| LEPIDOPTERA  | <i>Heliconius melpomene</i>       | <a href="http://www.butterflygenome.org/">http://www.butterflygenome.org/</a>                                                                         | Assembly v1.1          |
| HYMENOPTERA  | <i>Nasonia vitripennis</i>        | <a href="http://hymenopteragenome.org/nasonia/">http://hymenopteragenome.org/nasonia/</a>                                                             | Nvit_1.0               |
| HYMENOPTERA  | <i>Bombus impatiens</i>           | <a href="http://hymenopteragenome.org/beebase/">http://hymenopteragenome.org/beebase/</a>                                                             | Bimp_2.0               |
| HYMENOPTERA  | <i>Apis mellifera</i>             | <a href="http://hymenopteragenome.org/beebase/">http://hymenopteragenome.org/beebase/</a>                                                             | Amel_4.5               |
| HYMENOPTERA  | <i>Atta cephalotes</i>            | <a href="http://hymenopteragenome.org/ant_genomes/">http://hymenopteragenome.org/ant_genomes/</a>                                                     | Acep_1.0               |
| COLEOPTERA   | <i>Tribolium castaneum</i>        | <a href="http://beetlebase.org/">http://beetlebase.org/</a>                                                                                           | 13-Dec                 |
| HEMIPTERA    | <i>Acyrtosiphon pisum</i>         | <a href="http://www.aphidbase.com/">http://www.aphidbase.com/</a>                                                                                     | Version 2.1            |
| HEMIPTERA    | <i>Rhodnius prolixus</i>          | <a href="https://www.vectorbase.org/organisms/rhodnius-prolixus">https://www.vectorbase.org/organisms/rhodnius-prolixus</a>                           | Feb-14                 |
| PHTHIRAPTERA | <i>Pediculus humanus corporis</i> | NCBI Genbank                                                                                                                                          | JCVI_LOUSE_1.0         |

Figure 1- supplemental source data 1
