# Supplementary material for: Recurrent loss of CenH3 is associated with independent transitions to holocentricity in insects
Source: PubMed Central journal article supplement (PMC4359364; doi:10.7554/elife.03676), 2014-09-23
Supplement: elife03676s002.pdf [file elife03676s002.pdf]

| Order         | Species                          | Centromere type | Reads (total) | Single end |          | Paired end |          | 454 reads | Transcripts (>250 bp) | Predicted number of proteins |                               |
|---------------|----------------------------------|-----------------|---------------|------------|----------|------------|----------|-----------|-----------------------|------------------------------|-------------------------------|
|               |                                  |                 |               | 100bp      | 150bp    | 50bp       | 100bp    |           |                       | Query: <i>T. castaneum</i>   | Query: <i>D. melanogaster</i> |
| DIPTERA       | <i>Drosophila melanogaster</i>   | M               | 8769862       | /          | /        | /          | 4384931  | /         | 15040                 | 4605                         | 6309                          |
| COLEOPTERA    | <i>Chrysochus auratus</i>        | M               | 11061439      | 3284909    | /        | /          | 3888265  | /         | 21467                 | 6096                         | 5025                          |
| COLEOPTERA    | <i>Cyrtopistomus castaneus</i>   | M               | 24784232      | /          | /        | /          | 12392116 | /         | 24956                 | 7122                         | 5946                          |
| COLEOPTERA    | <i>Labidomera clivicollis</i>    | M               | 6935044       | 6935044    | /        | /          | /        | /         | 16705                 | 6079                         | 5124                          |
| COLEOPTERA    | <i>Megacyllene robiniae</i>      | M               | 4245152       | 4245152    | /        | /          | /        | /         | 7992                  | 4002                         | 3388                          |
| COLEOPTERA    | <i>Plagioderia versicolora</i>   | M               | 1907103       | 1907103    | /        | /          | /        | /         | 9275                  | 4133                         | 3510                          |
| COLEOPTERA    | <i>Rhyssomatus lineaticollis</i> | M               | 12012820      | 3417256    | /        | /          | 4297782  | /         | 17593                 | 6576                         | 5456                          |
| COLEOPTERA    | <i>Tetraopes tetraophthalmus</i> | M               | 8273718       | 8273718    | /        | /          | /        | /         | 15525                 | 6261                         | 5128                          |
| COLEOPTERA    | <i>Anoplophora glabripennis</i>  | M               | 126613384     | /          | /        | /          | 63306692 | /         | 23482                 | 7867                         | 6386                          |
| COLEOPTERA    | <i>Leptinotarsa decemlineata</i> | M               | 87064144      | /          | /        | /          | 43532072 | /         | 35657                 | 8026                         | 6482                          |
| LEPIDOPTERA   | <i>Cyrcia tenera</i>             | H               | 11258986      | /          | /        | /          | 5629493  | /         | 16643                 | 5400                         | 4180                          |
| LEPIDOPTERA   | <i>Danaus erismus</i>            | H               | 11756762      | 1308633    | /        | /          | 5878381  | /         | 10709                 | 5091                         | 4138                          |
| LEPIDOPTERA   | <i>Danaus gillipus</i>           | H               | 3476486       | /          | /        | /          | 1738243  | /         | 9607                  | 4568                         | 3594                          |
| LEPIDOPTERA   | <i>Euchaetes egle</i>            | H               | 19883080      | 5905128    | /        | /          | 6988976  | /         | 23427                 | 7296                         | 5622                          |
| LEPIDOPTERA   | <i>Lophocampa caryae</i>         | H               | 4958026       | 4958026    | /        | /          | /        | /         | 17455                 | 5655                         | 4500                          |
| LEPIDOPTERA   | <i>Limenitis archippus</i>       | H               | 3933071       | 3933071    | /        | /          | /        | /         | 9758                  | 4383                         | 3588                          |
| LEPIDOPTERA   | <i>Lycorea halia atergatis</i>   | H               | 18968673      | 16067453   | /        | /          | 1450610  | /         | 11655                 | 4249                         | 3233                          |
| LEPIDOPTERA   | <i>Papilio glaucus</i>           | H               | 25863591      | 25863591   | /        | /          | /        | /         | 19000                 | 7096                         | 5690                          |
| LEPIDOPTERA   | <i>Trichordestra legitima</i>    | H               | 9474598       | /          | /        | /          | 4737299  | /         | 17576                 | 6336                         | 4955                          |
| HEMIPTERA     | <i>Aphis nerii</i>               | H               | 28196792      | /          | /        | /          | 14098396 | /         | 17381                 | 6276                         | 5924                          |
| HEMIPTERA     | <i>Boisea trivittata</i>         | H               | 4858096       | 4858096    | /        | /          | /        | /         | 13718                 | 4793                         | 4483                          |
| HEMIPTERA     | <i>Lygaeus kalmii</i>            | H               | 51924504      | 9476280    | /        | /          | 21224112 | /         | 32157                 | 5994                         | 5650                          |
| HEMIPTERA     | <i>Oncopeltus fasciatus</i>      | H               | 57681394      | 7888794    | /        | /          | 27109674 | /         | 42184                 | 6156                         | 5734                          |
| DERMAPTERA    | <i>Anisolabis maritima</i>       | H               | 87562912      | /          | /        | 43781456   | /        | /         | 26353                 | 6401                         | 6004                          |
| DERMAPTERA    | <i>Forficula auricularia</i>     | H               | 119368478     | 37973906   | 80044415 | /          | /        | 1350152   | 75242                 | 7682                         | 7061                          |
| ORTHOPTERA    | <i>Acheta domesticus</i>         | M               | 82905718      | /          | /        | 41452859   | /        | /         | 27393                 | 6271                         | 5882                          |
| PHASMATODEA   | <i>Sipylodea sipylus</i>         | M               | 262246196     | /          | /        | 131123098  | /        | /         | 48280                 | 6672                         | 6063                          |
| BLATTODEA     | <i>Blatella germanica</i>        | M               | 244693922     | /          | /        | 122346961  | /        | /         | 47592                 | 6239                         | 5806                          |
| ODONATA       | <i>Ladona fulva</i>              | H               | 77135056      | /          | /        | /          | 38567528 | /         | 27320                 | 6283                         | 5871                          |
| ODONATA       | <i>Libellula vibrans</i>         | H               | 81875594      | /          | /        | 40937797   | /        | /         | 49642                 | 7074                         | 6778                          |
| EPHEMEROPTERA | <i>Ephemera danica</i>           | M               | 105860062     | /          | /        | /          | 52930031 | /         | 48321                 | 6601                         | 6174                          |

Figure 1- supplemental source data 2
